# Supplementary material
Source: PubMed Central journal article supplement (PMC3540110)
Supplement: NIHMS431339-supplement-supplement_1.pdf [file NIHMS431339-supplement-supplement_1.pdf]

**eAppendix A. Part D Claims Rejections in the Nursing Home Setting, Reasons for Rejection (2006-2010)**

|                                                      | <b>Number of Rejections</b> | <b>Percent of All Rejections</b> | <b>Percent of Rejections in Category</b> |
|------------------------------------------------------|-----------------------------|----------------------------------|------------------------------------------|
| <b>Administrative Rejections</b>                     |                             |                                  |                                          |
| Non-Matched Pharmacy Number                          | 438,533                     | 13.6%                            | 31.1%                                    |
| M/I Dispense As Written (DAW)/Product Selection Code | 112,135                     | 3.5%                             | 8.0%                                     |
| Non-Matched Cardholder ID                            | 102,656                     | 3.2%                             | 7.3%                                     |
| M/I Date of Service                                  | 80,207                      | 2.5%                             | 5.7%                                     |
| Claim Is Post-Dated                                  | 80,190                      | 2.5%                             | 5.7%                                     |
| Filled After Coverage Terminated                     | 68,072                      | 2.1%                             | 4.8%                                     |
| M/I Professional Service Code                        | 56,346                      | 1.7%                             | 4.0%                                     |
| Patient Is Not Covered                               | 49,036                      | 1.5%                             | 3.5%                                     |
| M/I Birth Date                                       | 46,522                      | 1.4%                             | 3.3%                                     |
| Duplicate Paid/Captured Claim                        | 41,156                      | 1.3%                             | 2.9%                                     |
| Claim Not Processed                                  | 34,256                      | 1.1%                             | 2.4%                                     |
| M/I Quantity Dispensed                               | 29,589                      | 0.9%                             | 2.1%                                     |
| M/I Days Supply                                      | 28,045                      | 0.9%                             | 2.0%                                     |
| M/I Cardholder ID Number                             | 24,117                      | 0.7%                             | 1.7%                                     |
| M/I Patient Relationship Code                        | 23,958                      | 0.7%                             | 1.7%                                     |
| Submit Bill To Other Processor Or Primary Payer      | 19,193                      | 0.6%                             | 1.4%                                     |
| M/I Prescriber ID                                    | 14,262                      | 0.4%                             | 1.0%                                     |
| Discontinued Product/Service ID Number               | 14,098                      | 0.4%                             | 1.0%                                     |
| Reversal Not Processed                               | 13,969                      | 0.4%                             | 1.0%                                     |
| M/I Prescriber ID Qualifier                          | 13,670                      | 0.4%                             | 1.0%                                     |
| M/I Patient Gender Code                              | 12,568                      | 0.4%                             | 0.9%                                     |
| M/I Other Coverage Cod                               | 9,728                       | 0.3%                             | 0.7%                                     |
| Filled After Coverage Expired                        | 8,239                       | 0.3%                             | 0.6%                                     |
| M/I Result Of Service Code                           | 6,786                       | 0.2%                             | 0.5%                                     |
| Claim Too Old                                        | 5,518                       | 0.2%                             | 0.4%                                     |
| M/I Group Number                                     | 5,466                       | 0.2%                             | 0.4%                                     |
| M/I Date Prescription Written                        | 5,428                       | 0.2%                             | 0.4%                                     |
| M/I Processor Control Number                         | 5,125                       | 0.2%                             | 0.4%                                     |
| M/I Reason For Service Code                          | 5,119                       | 0.2%                             | 0.4%                                     |
| Non-Matched Product/Service ID Number                | 5,035                       | 0.2%                             | 0.4%                                     |

|                                                            |       |      |      |
|------------------------------------------------------------|-------|------|------|
| M/I COB/Other Payments Segment                             | 4,926 | 0.2% | 0.3% |
| Pharmacy Not Contracted With Plan On Date Of Service       | 4,836 | 0.2% | 0.3% |
| M/I Prior Authorization Type Code                          | 4,205 | 0.1% | 0.3% |
| M/I Prior Authorization Number Submitted                   | 3,574 | 0.1% | 0.3% |
| Non-Matched Prescriber ID                                  | 2,760 | 0.1% | 0.2% |
| Non-Matched Group ID                                       | 2,542 | 0.1% | 0.2% |
| M/I Percentage Sales Tax Basis Submitted                   | 1,876 | 0.1% | 0.1% |
| Filled Before Coverage Effective                           | 1,853 | 0.1% | 0.1% |
| Prescriber Is Not Covered                                  | 1,805 | 0.1% | 0.1% |
| M/I Bin                                                    | 1,748 | 0.1% | 0.1% |
| M/I Patient Zip/Postal Zone                                | 1,491 | 0.0% | 0.1% |
| M/I Product/Service ID                                     | 1,463 | 0.0% | 0.1% |
| M/I Usual And Customary Charge                             | 1,366 | 0.0% | 0.1% |
| M/I Patient ID                                             | 1,297 | 0.0% | 0.1% |
| Claim Has Not Been Paid/Captured                           | 1,181 | 0.0% | 0.1% |
| M/I Patient Location                                       | 1,145 | 0.0% | 0.1% |
| M/I Person Code                                            | 1,145 | 0.0% | 0.1% |
| M/I Coordination Of Benefits/Other Payments Count          | 668   | 0.0% | 0.0% |
| M/I Prescription Origin Code                               | 636   | 0.0% | 0.0% |
| Date Written Is After Date Filled                          | 600   | 0.0% | 0.0% |
| M/I Pharmacy Number                                        | 535   | 0.0% | 0.0% |
| M/I Other Payer Amount Paid Qualifier                      | 498   | 0.0% | 0.0% |
| M/I Patient Last Name                                      | 493   | 0.0% | 0.0% |
| M/I Other Payer Reject Count                               | 452   | 0.0% | 0.0% |
| M/I Diagnosis Code Qualifier                               | 411   | 0.0% | 0.0% |
| M/I Compound Product ID                                    | 408   | 0.0% | 0.0% |
| M/I Other Payer Date                                       | 399   | 0.0% | 0.0% |
| M/I DUR/PPS Segment                                        | 377   | 0.0% | 0.0% |
| M/I Software Vendor/Certification ID                       | 369   | 0.0% | 0.0% |
| M/I Ingredient Cost Submitted                              | 327   | 0.0% | 0.0% |
| M/I Other Payer Amount Paid                                | 319   | 0.0% | 0.0% |
| M/I Compound Segment                                       | 264   | 0.0% | 0.0% |
| M/I Insurance Segment                                      | 247   | 0.0% | 0.0% |
| M/I Percentage Sales Tax Amount Submitted                  | 239   | 0.0% | 0.0% |
| Non-Matched Product Package Size                           | 234   | 0.0% | 0.0% |
| Value In Gross Amount Due Does Not Follow Pricing Formulae | 228   | 0.0% | 0.0% |

|                                                               |     |      |      |
|---------------------------------------------------------------|-----|------|------|
| M/I Diagnosis Code                                            | 219 | 0.0% | 0.0% |
| Other Carrier Payment Meets Or Exceeds Payable                | 214 | 0.0% | 0.0% |
| Syntax Error                                                  | 203 | 0.0% | 0.0% |
| M/I Professional Service Fee Submitted                        | 200 | 0.0% | 0.0% |
| M/I Patient ID Qualifier                                      | 194 | 0.0% | 0.0% |
| M/I Compound Code                                             | 186 | 0.0% | 0.0% |
| M/I Other Payer Amount Paid Count                             | 185 | 0.0% | 0.0% |
| Non-Matched Person Code                                       | 180 | 0.0% | 0.0% |
| M/I Submission Clarification Code                             | 164 | 0.0% | 0.0% |
| M/I Prescription/Service Reference Number                     | 134 | 0.0% | 0.0% |
| M/I Product/Service ID Qualifier                              | 127 | 0.0% | 0.0% |
| M/I Patient Paid Amount Submitted                             | 121 | 0.0% | 0.0% |
| M/I Other Payer ID                                            | 111 | 0.0% | 0.0% |
| M/I Other Payer ID Qualifier                                  | 109 | 0.0% | 0.0% |
| M/I Fill Number                                               | 99  | 0.0% | 0.0% |
| M/I Primary Care Provider ID                                  | 92  | 0.0% | 0.0% |
| M/I Number Refills Authorized                                 | 69  | 0.0% | 0.0% |
| M/I Patient Street Address                                    | 69  | 0.0% | 0.0% |
| M/I Intermediary Authorization Type ID                        | 64  | 0.0% | 0.0% |
| M/I Cardholder Last Name                                      | 62  | 0.0% | 0.0% |
| M/I Percentage Sales Tax Rate Submitted                       | 61  | 0.0% | 0.0% |
| M/I Other Amount Claimed Submitted Count                      | 52  | 0.0% | 0.0% |
| M/I Other Payer Reject Code                                   | 52  | 0.0% | 0.0% |
| M/I Metric Quantity                                           | 51  | 0.0% | 0.0% |
| M/I Other Payer Coverage Type                                 | 51  | 0.0% | 0.0% |
| M/I Unit Of Measure                                           | 51  | 0.0% | 0.0% |
| M/I Eligibility Clarification Code                            | 36  | 0.0% | 0.0% |
| Requires Manual Claim                                         | 29  | 0.0% | 0.0% |
| M/I Compound Ingredient Basis Of Cost Determination           | 25  | 0.0% | 0.0% |
| M/I Segment Identification                                    | 25  | 0.0% | 0.0% |
| M/I Service Provider ID Qualifier                             | 23  | 0.0% | 0.0% |
| M/I Other Amount Claimed Submitted Qualifier                  | 22  | 0.0% | 0.0% |
| M/I Prescription/Service Reference Number Qualifier           | 21  | 0.0% | 0.0% |
| M/I Patient First Name                                        | 19  | 0.0% | 0.0% |
| M/I Patient City Address                                      | 17  | 0.0% | 0.0% |
| Other Payer Reject Count Does Not Match Number Of Repetitions | 16  | 0.0% | 0.0% |

|                                                                                    |    |      |      |
|------------------------------------------------------------------------------------|----|------|------|
| Prescription/Service Reference Number/Time Limit Exceeded                          | 16 | 0.0% | 0.0% |
| Drug-Diagnosis Mismatch                                                            | 14 | 0.0% | 0.0% |
| M/I Gross Amount Due                                                               | 14 | 0.0% | 0.0% |
| M/I Plan ID                                                                        | 14 | 0.0% | 0.0% |
| QMB (Qualified Medicare Beneficiary)-Bill Medicare                                 | 14 | 0.0% | 0.0% |
| M/I Basis Of Cost                                                                  | 12 | 0.0% | 0.0% |
| M/I Level Of Service                                                               | 11 | 0.0% | 0.0% |
| M/I Compound Ingredient Component Count                                            | 10 | 0.0% | 0.0% |
| M/I DUR Co-Agent ID Qualifier                                                      | 8  | 0.0% | 0.0% |
| M/I Quantity Prescribed                                                            | 8  | 0.0% | 0.0% |
| M/I Compound Dispensing Unit Form Indicator                                        | 7  | 0.0% | 0.0% |
| M/I Other Amount Claimed Submitted                                                 | 7  | 0.0% | 0.0% |
| M/I Unit Dose Indicator                                                            | 7  | 0.0% | 0.0% |
| Mandatory Data Elements Must Occur Before Optional Data Elements In A Segment      | 7  | 0.0% | 0.0% |
| M/I DUR/PPS Level Of Effort                                                        | 6  | 0.0% | 0.0% |
| M/I Transaction Code                                                               | 6  | 0.0% | 0.0% |
| Patient Age Exceeds Maximum Age                                                    | 6  | 0.0% | 0.0% |
| Primary Prescriber Is Not Covered                                                  | 6  | 0.0% | 0.0% |
| M/I Patient State/Province Address                                                 | 5  | 0.0% | 0.0% |
| Billing Provider Not Eligible To Bill This Claim Type                              | 4  | 0.0% | 0.0% |
| Compound Ingredient Component Count Does Not Match Number Of Repetitions           | 4  | 0.0% | 0.0% |
| M/I Basis Of Cost Determination                                                    | 4  | 0.0% | 0.0% |
| M/I DUR/PPS Code Counter                                                           | 4  | 0.0% | 0.0% |
| M/I Prescriber Last Name                                                           | 4  | 0.0% | 0.0% |
| M/I Intermediary Authorization ID                                                  | 3  | 0.0% | 0.0% |
| M/I Primary Care Provider ID Qualifier                                             | 3  | 0.0% | 0.0% |
| Coordination Of Benefits/Other Payments Count Does Not Match Number Of Repetitions | 2  | 0.0% | 0.0% |
| M/I Compound Dosage Form Description Code                                          | 2  | 0.0% | 0.0% |
| M/I DUR Co-Agent ID                                                                | 2  | 0.0% | 0.0% |
| M/I Patient Phone Number                                                           | 2  | 0.0% | 0.0% |
| M/I Quantity Intended To Be Dispensed                                              | 2  | 0.0% | 0.0% |
| M/I Version Number                                                                 | 2  | 0.0% | 0.0% |
| M/I Authorization Number                                                           | 1  | 0.0% | 0.0% |
| M/I Compound Ingredient Quantity                                                   | 1  | 0.0% | 0.0% |
| M/I Date Of Injury                                                                 | 1  | 0.0% | 0.0% |
| M/I Dispensing Fee Submitted                                                       | 1  | 0.0% | 0.0% |

|                                 |           |      |      |
|---------------------------------|-----------|------|------|
| M/I Pricing Segment             | 1         | 0.0% | 0.0% |
| M/I Prior Authorization Segment | 1         | 0.0% | 0.0% |
| M/I Request Type                | 1         | 0.0% | 0.0% |
| M/I Sales Tax                   | 1         | 0.0% | 0.0% |
| Total                           | 1,409,516 |      |      |

**Utilization Management**

|                                                    |           |       |       |
|----------------------------------------------------|-----------|-------|-------|
| Refill Too Soon                                    | 602,765   | 18.7% | 43.4% |
| DUR Reject Error                                   | 420,940   | 13.1% | 30.3% |
| Plan Limitations Exceeded                          | 240,192   | 7.5%  | 17.3% |
| Prior Authorization Required                       | 116,333   | 3.6%  | 8.4%  |
| Days Supply Limitation For Product/Service         | 4,562     | 0.1%  | 0.3%  |
| Cost Exceeds Maximum                               | 2,189     | 0.1%  | 0.2%  |
| Recipient Locked In                                | 267       | 0.0%  | 0.0%  |
| Prior Authorization Denied                         | 266       | 0.0%  | 0.0%  |
| Refills Are Not Covered                            | 126       | 0.0%  | 0.0%  |
| Claim Submitted Does Not Match Prior Authorization | 62        | 0.0%  | 0.0%  |
| Product/Service Not Appropriate For This Location  | 10        | 0.0%  | 0.0%  |
| Generic Drug Required                              | 5         | 0.0%  | 0.0%  |
| Total                                              | 1,387,717 |       |       |

**Product Not Covered**

|                                                |         |       |       |
|------------------------------------------------|---------|-------|-------|
| Product/Service Not Covered                    | 422,886 | 13.1% | 99.6% |
| Product/Service Not Covered For Patient Age    | 1,452   | 0.0%  | 0.3%  |
| Product/Service Not Covered For Patient Gender | 320     | 0.0%  | 0.1%  |
| Total                                          | 424,658 |       |       |

[Missing rejection reason] 638 0.0%

COB indicates coordination of benefits; ID, identification; M/I, missing/invalid; PPS, prospective payment system; QMB, qualified Medicare beneficiary.

Source: Authors' analysis of data provided by Omnicare, Inc, the nation's largest long-term care pharmacy. Data include all paid and rejected Part D claims from the month of March in each study year.

**eAppendix B. Part D Claims Rejections in the Nursing Home Setting, Drugs in 7 Classes of Interest (2006-2010)**

| <b>Class</b>    | <b>Drug Name</b>                                 |
|-----------------|--------------------------------------------------|
| ANTIDEPRESSANTS | AMITRIPTYLINE HYDROCHLORIDE TABLETS              |
| ANTIDEPRESSANTS | AMOXAPINE TABLETS                                |
| ANTIDEPRESSANTS | ANAFRANIL CAPSULES                               |
| ANTIDEPRESSANTS | APLENZIN TABLETS EXTENDED RELEASE                |
| ANTIDEPRESSANTS | AVENTYL HYDROCHLORIDE ORAL SOLUTION              |
| ANTIDEPRESSANTS | BUDEPRION TABLETS EXTENDED RELEASE               |
| ANTIDEPRESSANTS | BUDEPRION TABLETS XL                             |
| ANTIDEPRESSANTS | BUDEPRION TABLETS XL EXTENDED RELEASE            |
| ANTIDEPRESSANTS | BUPROBAN TABLETS EXTENDED RELEASE                |
| ANTIDEPRESSANTS | BUPROPION HYDROCHLORIDE TABLETS                  |
| ANTIDEPRESSANTS | BUPROPION HYDROCHLORIDE TABLETS EXTENDED RELEASE |
| ANTIDEPRESSANTS | CELEXA ORAL SOLUTION                             |
| ANTIDEPRESSANTS | CELEXA TABLETS                                   |
| ANTIDEPRESSANTS | CITALOPRAM HYDROBROMIDE ORAL SOLUTION            |
| ANTIDEPRESSANTS | CITALOPRAM TABLETS                               |
| ANTIDEPRESSANTS | CLOMIPRAMINE HYDROCHLORIDE CAPSULES              |
| ANTIDEPRESSANTS | CYMBALTA CAPSULES EXTENDED RELEASE               |
| ANTIDEPRESSANTS | DESIPRAMINE HYDROCHLORIDE TABLETS                |
| ANTIDEPRESSANTS | DESYREL TABLETS                                  |
| ANTIDEPRESSANTS | EFFEXOR CAPSULES EXTENDED RELEASE                |
| ANTIDEPRESSANTS | EFFEXOR TABLETS                                  |
| ANTIDEPRESSANTS | ELAVIL TABLETS                                   |
| ANTIDEPRESSANTS | EMSAM PATCH/DISC                                 |
| ANTIDEPRESSANTS | EMSAM TRANSDERMAL SYSTEM PATCHES                 |
| ANTIDEPRESSANTS | FLUOXETINE CAPSULES                              |
| ANTIDEPRESSANTS | FLUOXETINE HYDROCHLORIDE TABLETS                 |
| ANTIDEPRESSANTS | FLUOXETINE ORAL SOLUTION                         |
| ANTIDEPRESSANTS | FLUVOXAMINE MALEATE TABLETS                      |
| ANTIDEPRESSANTS | GABITRIL TIAGABINE HYDROCHLORIDE TABLETS         |
| ANTIDEPRESSANTS | IMIPRAMINE HYDROCHLORIDE TABLETS                 |
| ANTIDEPRESSANTS | IMIPRAMINE PAMOATE CAPSULES                      |
| ANTIDEPRESSANTS | LEXAPRO SOLUTION                                 |
| ANTIDEPRESSANTS | LEXAPRO TABLETS                                  |

|                 |                                                   |
|-----------------|---------------------------------------------------|
| ANTIDEPRESSANTS | LUVOX CAPSULES EXTENDED RELEASE                   |
| ANTIDEPRESSANTS | LUVOX TABLETS                                     |
| ANTIDEPRESSANTS | MAPROTILINE HYDROCHLORIDE TABLETS                 |
| ANTIDEPRESSANTS | MARPLAN TABLETS                                   |
| ANTIDEPRESSANTS | MIRTAZAPINE DISSOLVABLE TABLETS                   |
| ANTIDEPRESSANTS | MIRTAZAPINE TABLETS                               |
| ANTIDEPRESSANTS | MIRTAZAPINE TABLETS ORALLY DISINTEGRATING         |
| ANTIDEPRESSANTS | NARDIL TABLETS                                    |
| ANTIDEPRESSANTS | NEFAZODONE HYDROCHLORIDE TABLETS                  |
| ANTIDEPRESSANTS | NORPRAMIN TABLETS                                 |
| ANTIDEPRESSANTS | NORTRIPTYL HYDROCHLORIDE CAPSULES                 |
| ANTIDEPRESSANTS | NORTRIPTYLINE HYDROCHLORIDE CAPSULES              |
| ANTIDEPRESSANTS | NORTRIPTYLINE HYDROCHLORIDE ORAL SOLUTION         |
| ANTIDEPRESSANTS | PAMELOR                                           |
| ANTIDEPRESSANTS | PAMELOR CAPSULES                                  |
| ANTIDEPRESSANTS | PAMELOR ORAL SOLUTION                             |
| ANTIDEPRESSANTS | PARNATE TABLETS                                   |
| ANTIDEPRESSANTS | PAROXETINE HYDROCHLORIDE                          |
| ANTIDEPRESSANTS | PAROXETINE HYDROCHLORIDE ORAL SOLUTION            |
| ANTIDEPRESSANTS | PAROXETINE HYDROCHLORIDE TABLETS                  |
| ANTIDEPRESSANTS | PAROXETINE HYDROCHLORIDE TABLETS EXTENDED RELEASE |
| ANTIDEPRESSANTS | PAXIL ORAL SOLUTION                               |
| ANTIDEPRESSANTS | PAXIL TABLETS                                     |
| ANTIDEPRESSANTS | PAXIL TABLETS EXTENDED RELEASE                    |
| ANTIDEPRESSANTS | PEXEVA TABLETS                                    |
| ANTIDEPRESSANTS | PRISTIQ TABLETS EXTENDED RELEASE                  |
| ANTIDEPRESSANTS | PROTRIPTYLINE HYDROCHLORIDE TABLETS               |
| ANTIDEPRESSANTS | PROZAC CAPSULES                                   |
| ANTIDEPRESSANTS | PROZAC ORAL SOLUTION                              |
| ANTIDEPRESSANTS | PROZAC TABLETS                                    |
| ANTIDEPRESSANTS | PROZAC WEEKLY CAPSULES                            |
| ANTIDEPRESSANTS | REMERON SOLTAB TABLETS ORALLY DISINTEGRATING      |
| ANTIDEPRESSANTS | REMERON TABLETS                                   |
| ANTIDEPRESSANTS | SARAFEM TABLETS                                   |
| ANTIDEPRESSANTS | SAVELLA TABLETS                                   |
| ANTIDEPRESSANTS | SAVELLA TABLETS TITRATION PACK KIT                |

ANTIDEPRESSANTS  
ARBS  
ARBS  
ARBS  
ARBS  
ARBS  
ARBS  
ARBS  
ARBS  
ATYPICAL ANTIPSYCHOTICS  
ATYPICAL ANTIPSYCHOTICS  
ATYPICAL ANTIPSYCHOTICS  
ATYPICAL ANTIPSYCHOTICS

SERTRALINE HYDROCHLORIDE  
SERTRALINE HYDROCHLORIDE ORAL CONCENTRATE  
SERTRALINE HYDROCHLORIDE ORAL SOLUTION  
SERTRALINE HYDROCHLORIDE TABLETS  
SERZONE TABLETS  
SURMONTIL CAPSULES  
SYMBYAX CAPSULES  
TOFRANIL PM CAPSULES  
TOFRANIL TABLETS  
TRANLYCYPROMINE SULFATE TABLETS  
TRAZODONE HYDROCHLORIDE TABLETS  
TRAZODONE TABLETS  
TRIMIPRAMINE MALEATE CAPSULES  
VANATRIP TABLETS  
VENLAFAXINE HYDROCHLORIDE TABLETS  
VENLAFAXINE HYDROCHLORIDE TABLETS EXTENDED RELEASE  
VIVACTIL HYDROCHLORIDE TABLETS  
VIVACTIL TABLETS  
WELLBUTRIN TABLETS  
WELLBUTRIN TABLETS EXTENDED RELEASE  
WELLBUTRIN TABLETS XL EXTENDED RELEASE  
XENAZINE TABLETS  
ZOLOFT ORAL CONCENTRATE  
ZOLOFT TABLETS  
ATACAND TABLETS  
AVAPRO TABLETS  
BENICAR TABLETS  
COZAAR TABLETS  
DIOVAN CAPSULES  
DIOVAN TABLETS  
MICARDIS TABLETS  
TEVETEN TABLETS  
ABILIFY DISCMELT TABLETS ORALLY DISINTEGRATING  
ABILIFY ORAL SOLUTION  
ABILIFY SOLUTION INJECTION  
ABILIFY TABLETS









|                     |                                                        |
|---------------------|--------------------------------------------------------|
| LONG-ACTING OPIOIDS | MORPHINE SULFATE INJECTION                             |
| LONG-ACTING OPIOIDS | MORPHINE SULFATE INJECTION PRESERVATIVE FREE           |
| LONG-ACTING OPIOIDS | MORPHINE SULFATE IR ORAL SOLUTION                      |
| LONG-ACTING OPIOIDS | MORPHINE SULFATE ORAL SOLUTION                         |
| LONG-ACTING OPIOIDS | MORPHINE SULFATE RECTAL SUPPOSITORY                    |
| LONG-ACTING OPIOIDS | MORPHINE SULFATE SOLUTION                              |
| LONG-ACTING OPIOIDS | MORPHINE SULFATE SUPPOSITORIES                         |
| LONG-ACTING OPIOIDS | MORPHINE SULFATE SYRINGES DISPOSABLE                   |
| LONG-ACTING OPIOIDS | MORPHINE SULFATE TABLETS                               |
| LONG-ACTING OPIOIDS | MORPHINE SULFATE TABLETS EXTENDED RELEASE              |
| LONG-ACTING OPIOIDS | MORPHINE SULFATE TABLETS SOLUBLE                       |
| LONG-ACTING OPIOIDS | MORPHINE SULFATE VIALS INJECTABLE                      |
| LONG-ACTING OPIOIDS | MS CONTIN TABLETS                                      |
| LONG-ACTING OPIOIDS | MS CONTIN TABLETS EXTENDED RELEASE                     |
| LONG-ACTING OPIOIDS | MSIR CAPSULES IMMEDIATE RELEASE                        |
| LONG-ACTING OPIOIDS | MSIR IMMEDIATE RELEASE ORAL TABLETS                    |
| LONG-ACTING OPIOIDS | MSIR LIQUID                                            |
| LONG-ACTING OPIOIDS | OPANA TABLETS                                          |
| LONG-ACTING OPIOIDS | OPANA TABLETS EXTENDED RELEASE                         |
| LONG-ACTING OPIOIDS | OPIUM TINCTURE DEODORIZED                              |
| LONG-ACTING OPIOIDS | ORAL TRANSMUCOSAL FENTANYL CITRATE LOZENGES            |
| LONG-ACTING OPIOIDS | ORAMORPH EXTENDED RELEASE TABLETS SUSTAINED RELEASE    |
| LONG-ACTING OPIOIDS | ORAMORPH TABLETS EXTENDED RELEASE                      |
| LONG-ACTING OPIOIDS | OXYCONTIN EXTENDED RELEASED TABLETS CONTROLLED RELEASE |
| LONG-ACTING OPIOIDS | OXYCONTIN TABLETS EXTENDED RELEASE                     |
| LONG-ACTING OPIOIDS | RMS SUPPOSITORIES                                      |
| LONG-ACTING OPIOIDS | ROXANOL ORAL SOLUTION                                  |
| LONG-ACTING OPIOIDS | ROXANOL-T ORAL SOLUTION                                |
| LONG-ACTING OPIOIDS | RYZOLT TABLETS EXTENDED RELEASE                        |
| LONG-ACTING OPIOIDS | TRAMADOL HYDROCHLORIDE TABLETS                         |
| LONG-ACTING OPIOIDS | TRAMADOL HYDROCHLORIDE TABLETS EXTENDED RELEASE        |
| LONG-ACTING OPIOIDS | ULTRAM TABLETS                                         |
| LONG-ACTING OPIOIDS | ULTRAM TABLETS EXTENDED RELEASE                        |
| NEBULIZED INHALANTS | ACCUNEB INHALATION SOLUTION                            |
| NEBULIZED INHALANTS | ACETYLCYSTEINE INHALATION SOLUTION                     |
| NEBULIZED INHALANTS | ACETYLCYSTEINE SOLUTION                                |

|                          |                                                           |
|--------------------------|-----------------------------------------------------------|
| NEBULIZED INHALANTS      | ALBUTEROL SULFATE INHALATION SOLUTION                     |
| NEBULIZED INHALANTS      | ALUPENT INHALATION SOLUTION                               |
| NEBULIZED INHALANTS      | ATROVENT INHALATION SOLUTION                              |
| NEBULIZED INHALANTS      | BROVANA INHALATION SOLUTION                               |
| NEBULIZED INHALANTS      | BUDESONIDE INHALATION SUSPENSION                          |
| NEBULIZED INHALANTS      | CROMOLYN SODIUM INHALATION SOLUTION                       |
| NEBULIZED INHALANTS      | DUONEB INHALATION SOLUTION                                |
| NEBULIZED INHALANTS      | HYPER-SAL INHALATION SOLUTION                             |
| NEBULIZED INHALANTS      | INTAL INHALATION SOLUTION                                 |
| NEBULIZED INHALANTS      | INTAL NEBULIZER INHALATION SOLUTION                       |
| NEBULIZED INHALANTS      | IPRATROPIUM BROMIDE ALBUTEROL SULFATE INHALATION SOLUTION |
| NEBULIZED INHALANTS      | IPRATROPIUM BROMIDE INHALATION SOLUTION                   |
| NEBULIZED INHALANTS      | LEVALBUTEROL INHALANT SOLUTION                            |
| NEBULIZED INHALANTS      | METAPROTERENOL SULFATE                                    |
| NEBULIZED INHALANTS      | METAPROTERENOL SULFATE INHALATION SOLUTION                |
| NEBULIZED INHALANTS      | METAPROTERENOL SULFATE SOLUTION                           |
| NEBULIZED INHALANTS      | MUCOMYST INHALATION SOLUTION                              |
| NEBULIZED INHALANTS      | MUCOMYST-10 INHALATION SOLUTION                           |
| NEBULIZED INHALANTS      | PERFORMIST INHALATION SOLUTION                            |
| NEBULIZED INHALANTS      | PROVENTIL ORAL INHALATION SOLUTION                        |
| NEBULIZED INHALANTS      | PULMICORT INHALATION SOLUTION                             |
| NEBULIZED INHALANTS      | PULMICORT RESPULES INHALATION SUSPENSION                  |
| NEBULIZED INHALANTS      | PULMOZYME RECOMBINANT INHALATION SOLUTION                 |
| NEBULIZED INHALANTS      | S-2 INHALATION SOLUTION                                   |
| NEBULIZED INHALANTS      | SODIUM CHLORIDE INHALATION SOLUTION                       |
| NEBULIZED INHALANTS      | TOBI INHALATION SOLUTION                                  |
| NEBULIZED INHALANTS      | TOBI TOBRAMYCIN INHALATION SOLUTION                       |
| NEBULIZED INHALANTS      | VENTOLIN INHALATION SOLUTION                              |
| NEBULIZED INHALANTS      | XOPENEX INHALATION SOLUTION                               |
| NEBULIZED INHALANTS      | XOPENEX INHALATION SOLUTION CONCENTRATE                   |
| NEBULIZED INHALANTS      | XOPENEX SOLUTION                                          |
| OSTEOPOROSIS MEDICATIONS | ACTONEL TABLETS                                           |
| OSTEOPOROSIS MEDICATIONS | ACTONEL WITH CALCIUM TABLETS                              |
| OSTEOPOROSIS MEDICATIONS | ACTONEL WITH CALCIUM TABLETS KIT                          |
| OSTEOPOROSIS MEDICATIONS | ALENDRONATE SODIUM TABLETS                                |
| OSTEOPOROSIS MEDICATIONS | ARELIA INJECTION                                          |

OSTEOPOROSIS MEDICATIONS  
OSTEOPOROSIS MEDICATIONS

BONIVA INJECTION KIT  
BONIVA TABLETS  
CALCITONIN SALMON NASAL SPRAY SOLUTION  
CALCITONIN SALMON VIALS INJECTABLE  
DIDRONEL TABLETS  
ETIDRONATE DISODIUM TABLETS  
EVISTA TABLETS  
FORTEO INJECTION  
FORTEO PEN INJECTOR  
FORTICAL NASAL SPRAY  
FOSAMAX ONCE WEEKLY ORAL SOLUTION  
FOSAMAX PLUS D TABLETS  
FOSAMAX TABLETS  
MIACALCIN INJECTION  
MIACALCIN NASAL SPRAY  
PAMIDRONATE DISODIUM INJECTION  
RECLAST INJECTION  
ZOMETA INJECTION

**eAppendix C. Part D Claims Rejections in the Nursing Home Setting, 7 Classes of Interest (2006-2010)**

| <b>Year</b> | <b>class</b>              | <b>Total Claims</b> | <b>Reject Rate</b> | <b>Product Not Covered</b> | <b>Utilization Management</b> | <b>Administrative Rejections</b> |
|-------------|---------------------------|---------------------|--------------------|----------------------------|-------------------------------|----------------------------------|
| 2006        | ANTIDEPRESSANTS           | 309255              | 14%                | 11%                        | 30%                           | 59%                              |
| 2007        | ANTIDEPRESSANTS           | 326377              | 11%                | 8%                         | 44%                           | 48%                              |
| 2008        | ANTIDEPRESSANTS           | 304774              | 12%                | 4%                         | 49%                           | 47%                              |
| 2009        | ANTIDEPRESSANTS           | 311495              | 15%                | 4%                         | 51%                           | 45%                              |
| 2010        | ANTIDEPRESSANTS           | 314047              | 15%                | 2%                         | 50%                           | 47%                              |
| 2006        | ARBS                      | 30183               | 16%                | 17%                        | 26%                           | 57%                              |
| 2007        | ARBS                      | 33620               | 13%                | 9%                         | 44%                           | 47%                              |
| 2008        | ARBS                      | 33616               | 17%                | 11%                        | 49%                           | 40%                              |
| 2009        | ARBS                      | 33925               | 19%                | 23%                        | 39%                           | 38%                              |
| 2010        | ARBS                      | 33383               | 21%                | 19%                        | 35%                           | 46%                              |
| 2006        | ATYPICAL ANTIPSYCHOTICS   | 203064              | 15%                | 9%                         | 42%                           | 48%                              |
| 2007        | ATYPICAL ANTIPSYCHOTICS   | 211270              | 13%                | 1%                         | 56%                           | 43%                              |
| 2008        | ATYPICAL ANTIPSYCHOTICS   | 195708              | 15%                | 1%                         | 56%                           | 42%                              |
| 2009        | ATYPICAL ANTIPSYCHOTICS   | 202059              | 20%                | 1%                         | 55%                           | 44%                              |
| 2010        | ATYPICAL ANTIPSYCHOTICS   | 198972              | 20%                | 1%                         | 57%                           | 43%                              |
| 2006        | CHOLINESTERASE INHIBITORS | 134131              | 15%                | 6%                         | 37%                           | 56%                              |
| 2007        | CHOLINESTERASE INHIBITORS | 155271              | 10%                | 1%                         | 43%                           | 56%                              |
| 2008        | CHOLINESTERASE INHIBITORS | 159076              | 12%                | 1%                         | 45%                           | 54%                              |
| 2009        | CHOLINESTERASE INHIBITORS | 167800              | 13%                | 1%                         | 47%                           | 52%                              |
| 2010        | CHOLINESTERASE INHIBITORS | 172429              | 14%                | 1%                         | 45%                           | 54%                              |
| 2006        | LONG-ACTING OPIOIDS       | 68937               | 19%                | 12%                        | 47%                           | 42%                              |
| 2007        | LONG-ACTING OPIOIDS       | 70066               | 16%                | 14%                        | 53%                           | 32%                              |
| 2008        | LONG-ACTING OPIOIDS       | 70368               | 18%                | 6%                         | 68%                           | 26%                              |
| 2009        | LONG-ACTING OPIOIDS       | 80363               | 25%                | 18%                        | 46%                           | 36%                              |
| 2010        | LONG-ACTING OPIOIDS       | 68821               | 28%                | 15%                        | 41%                           | 44%                              |
| 2006        | NEBULIZED INHALANTS       | 69590               | 37%                | 49%                        | 29%                           | 22%                              |
| 2007        | NEBULIZED INHALANTS       | 72819               | 32%                | 58%                        | 22%                           | 20%                              |
| 2008        | NEBULIZED INHALANTS       | 73650               | 38%                | 49%                        | 32%                           | 19%                              |
| 2009        | NEBULIZED INHALANTS       | 69441               | 24%                | 23%                        | 50%                           | 27%                              |
| 2010        | NEBULIZED INHALANTS       | 69571               | 26%                | 20%                        | 52%                           | 27%                              |
| 2006        | OSTEOPOROSIS MEDICATIONS  | 64204               | 18%                | 8%                         | 39%                           | 53%                              |

|      |                          |       |     |     |     |     |
|------|--------------------------|-------|-----|-----|-----|-----|
| 2007 | OSTEOPOROSIS MEDICATIONS | 64753 | 13% | 9%  | 49% | 42% |
| 2008 | OSTEOPOROSIS MEDICATIONS | 57715 | 21% | 4%  | 38% | 58% |
| 2009 | OSTEOPOROSIS MEDICATIONS | 55236 | 21% | 15% | 43% | 43% |
| 2010 | OSTEOPOROSIS MEDICATIONS | 50296 | 20% | 9%  | 33% | 59% |

ARBS indicates angiotensin receptor blockers.

Source: Authors' analysis of data provided by Omnicare, Inc, the nation's largest long-term care pharmacy. Data include all paid and rejected Part D claims from the month of March in each study year.
